# Supplementary material
Source: HighWire-hosted journal article supplement (https://openres.ersjournals.com/content/5/4/00069-2019)

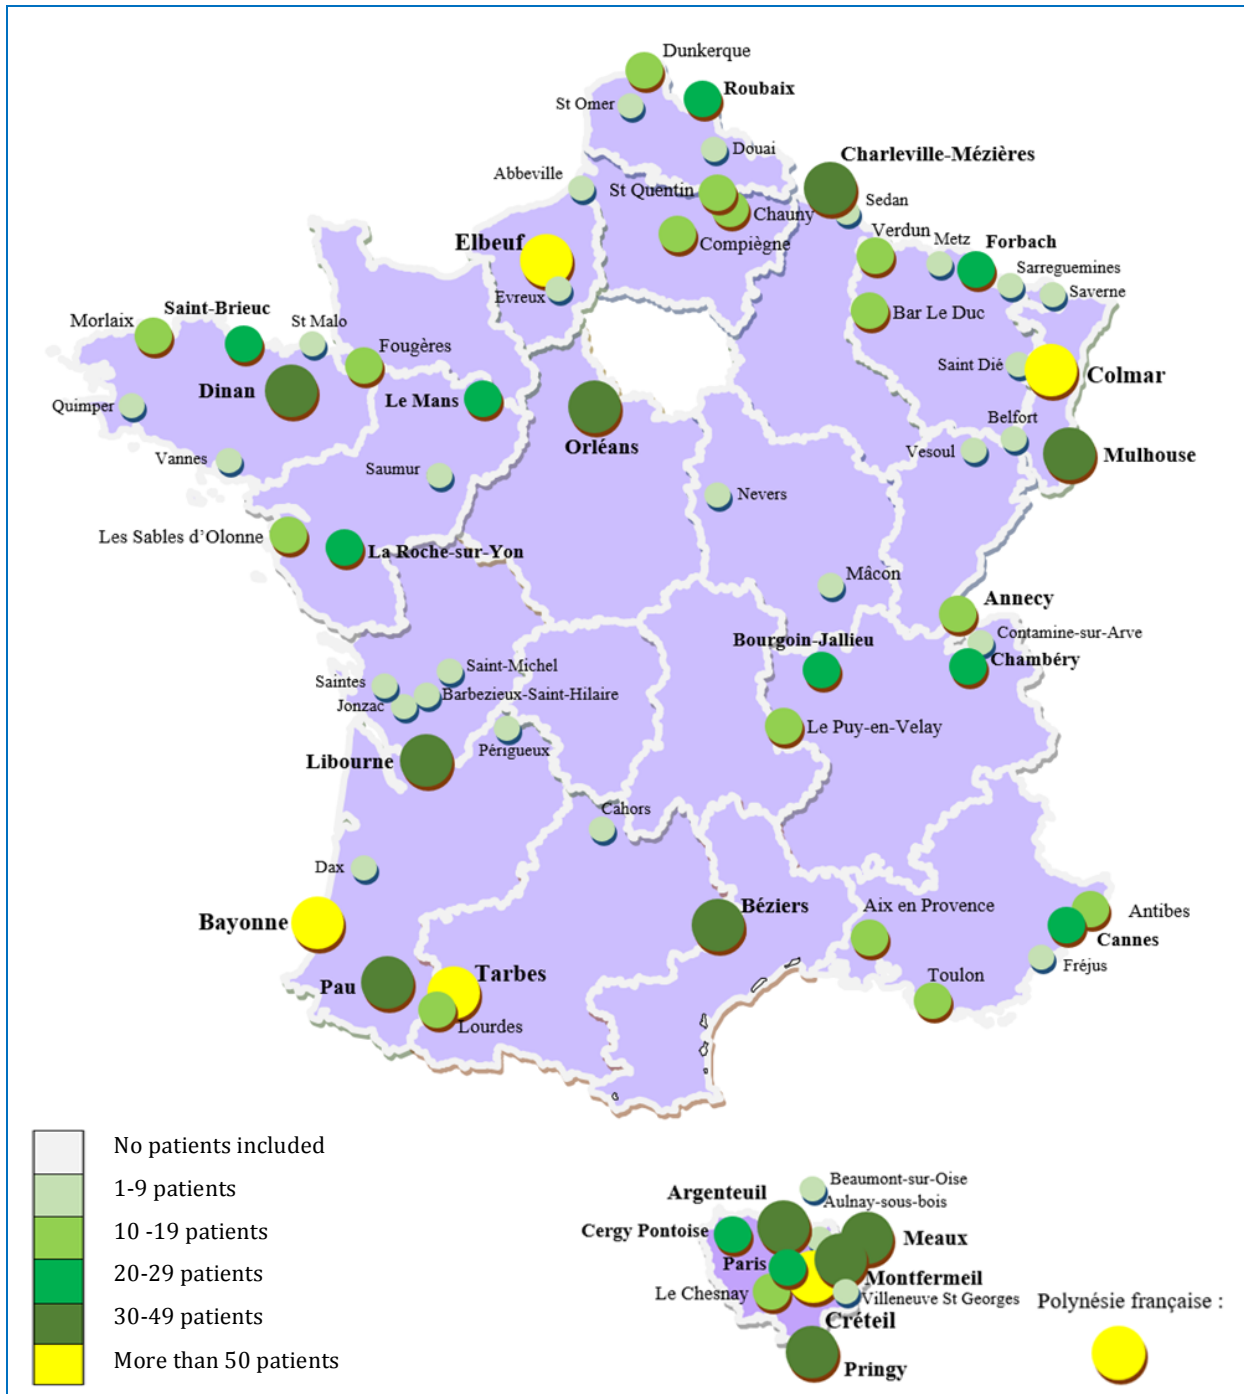

**Figure X : French map of participating centers**

Supplement: inline-supplementary-material-1 [file inline-supplementary-material-1.pdf]
